# Supplementary material for: Enhancing molecular aggregation and decreasing the optical gap by a dual-additive to reduce the energy loss of all-polymer organic solar cells
Source: Royal Society of Chemistry journal article supplement (doi:10.1039/d4tc03309d), 2024-11-18
Supplement: d4tc03309d1.pdf [file d4tc03309d1.pdf]

## Supporting Information for

To enhance the molecular aggregation and decrease the optical gap by the dual-additive to reduce the energy loss of all-polymer organic solar cells

Jiaqi Pan,<sup>a,b</sup> Qiang Zhang,<sup>a</sup> Jian Guan,<sup>a,b</sup> Hanyue Gao,<sup>a,b</sup> Luzhuo Li,<sup>a,b</sup> Rui Zhang,<sup>c</sup> Hongxiang Li,<sup>d</sup> Xinhong Yu<sup>a</sup> and Yanchun Han<sup>\*a,b</sup>

<sup>a</sup> State Key Laboratory of Polymer Physics and Chemistry, Changchun Institute of Applied Chemistry, Chinese Academy of Sciences, Changchun 130022, P. R. China

<sup>b</sup> School of Applied Chemistry and Engineering, University of Science and Technology of China, Hefei 230026, P.R. China

<sup>c</sup> Department of Physics, Chemistry and Biology (IFM), Linköping University, Linköping, Sweden

<sup>d</sup> College of Polymer Science and Engineering State Key Laboratory of Polymer Materials Engineering, Sichuan University Chengdu 610065, China

\* To whom correspondence should be addressed:

Email: [ychan@ciac.ac.cn](mailto:ychan@ciac.ac.cn) (Yanchun Han);

## **Table of Contents**

### **1. Device Characterization**

#### **2. Device performance:*J-V* Measurement**

**Figure S1.** *J-V* curves of the optimal binary OSCs with different additives under the illumination of AM 1.5G, 100 mW cm<sup>-2</sup>.

#### **3. Stability Test**

**Figure S2.** Storage stability in a nitrogen-filled glove of the un-encapsulated PM6:PYIT devices with no additive treatment and dual-additive treatment.

#### **4. Testing for $E_g$**

**Figure S3.** Changes in  $E_g$  of devices treated with different additives.

**Figure S4.** sEQE and EL spectra of devices treated with no additive and dual-additive.

#### **5. AFM Measurement**

**Figure S5.** The AFM height images of PM6:PYIT active layers (a) with CN (b) with DPE.

**Figure S6.** The AFM images of (a) PM6 pure films with different additives; (b) PYIT pure films with different additives.

#### **6. Film-Depth-Dependent Light Absorption Spectroscopy**

**Figure S7.** Film-depth-dependent-light absorption spectroscopy of (a) no additive and (b) dual-additive treated PM6:PYIT blend films.

#### **7. Contact angle measurement.**

**Figure S8.** Contact angle images of neat PM6 and PYIT films.

#### **8. UV-vis Absorption Spectroscopy**

**Figure S9.** Normalized UV-vis absorption spectrum: (a) PM6 pure films with different additives; (b) PYIT pure films with different additives.

**Figure S10.** The Normalized absorption spectra of the PM6:PYIT BHJ active layer prepared under different processing conditions.

#### **9. GIWAXS Measurement**

**Figure S11.** 2D GIWAXS images of (a) PM6 and (b) PYIT neat films before and after adding additives; The one-dimensional integrated signal of the (c) PM6 (100) peak and the (d) PYIT (010) peak in the out-of-plane direction.

## **10. Auxiliary Table**

**Table S1.** Photovoltaic performance parameters of the OSCs based on PM6:PYIT with different additives.

**Table S2.** Specific numerical changes of BHJ PM6: PYIT absorption peak under different processing conditions.

**Table S3.** Parameters related to (010) diffraction peaks in the out-of-plane direction of

PM6:PYIT thin films.

**Table S4.** GIWAXS Parameters of the out-of-plane (100) peak in the blend films.

## 1. Device Characterization

The current density–voltage ( $J$ - $V$ ) characteristics were tested under AM 1.5G irradiation ( $100 \text{ mW cm}^{-2}$ ) using a Keithley 2400 source meter. A QE-R 3011 was employed to give EQE data. EQE<sub>EL</sub> measurements were performed by applying external voltage/current sources through the devices (REPS, Enlitech). The FTPS-EQE measurement was carried out on an Enlitech FTPS PECT-600 instrument.

## 2. Device performance: $J$ - $V$ Measurement

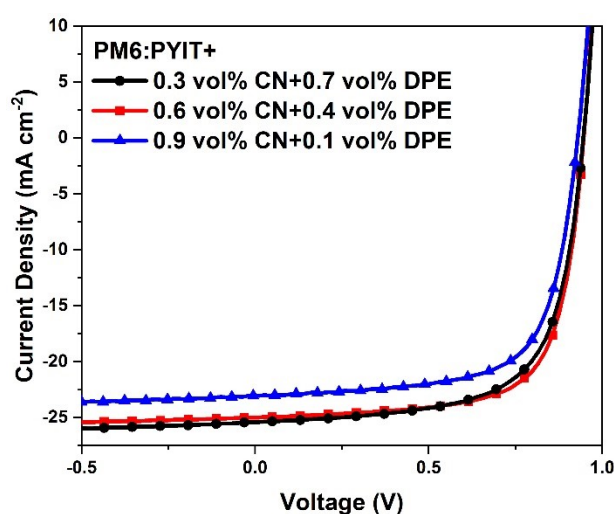

**Figure S1.**  $J$ - $V$  curves of the optimal binary OSCs with different additives under the illumination of AM 1.5G,  $100 \text{ mW cm}^{-2}$ .

## 3. Stability Test

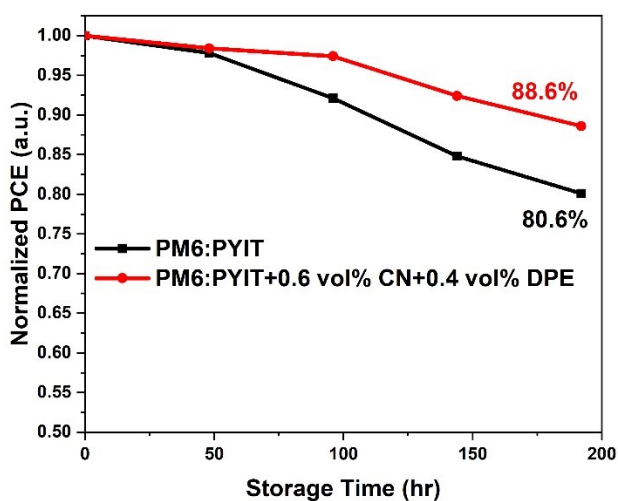

**Figure S2.** Storage stability in a nitrogen-filled glove of the un-encapsulated PM6:PYIT devices with no additive treatment and dual-additive treatment.

#### 4. Testing for $E_g$

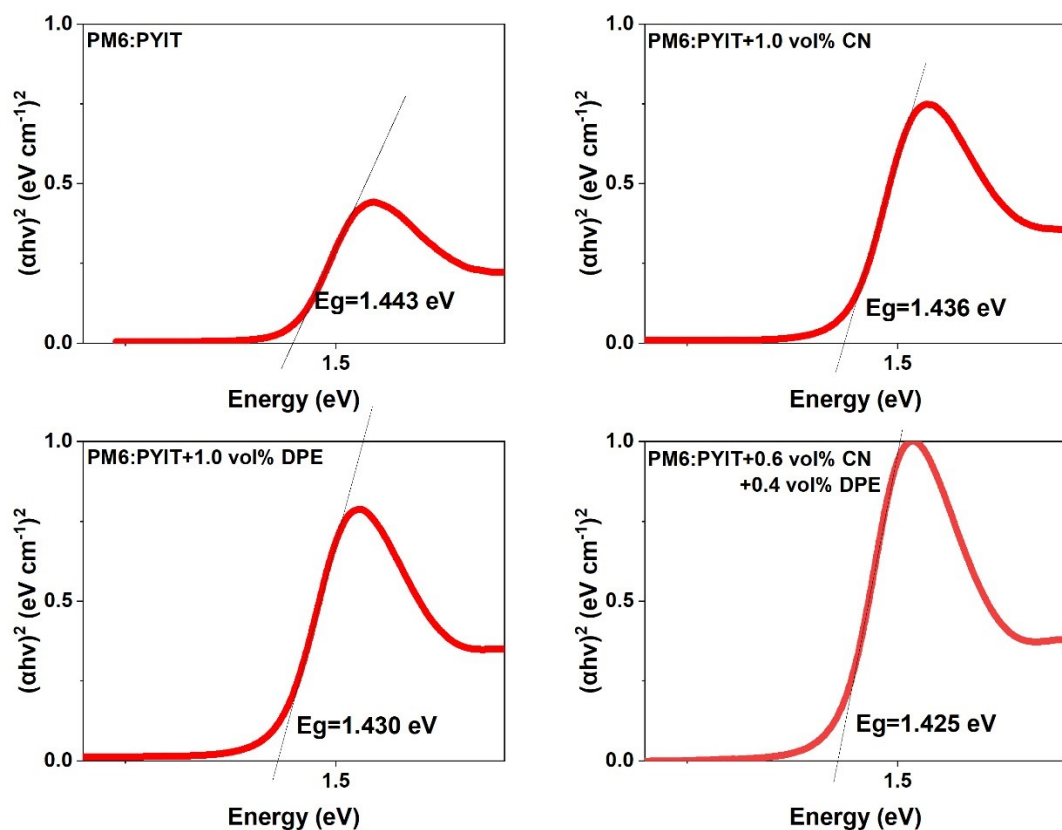

Figure S3. Changes in  $E_g$  of devices treated with different additives.

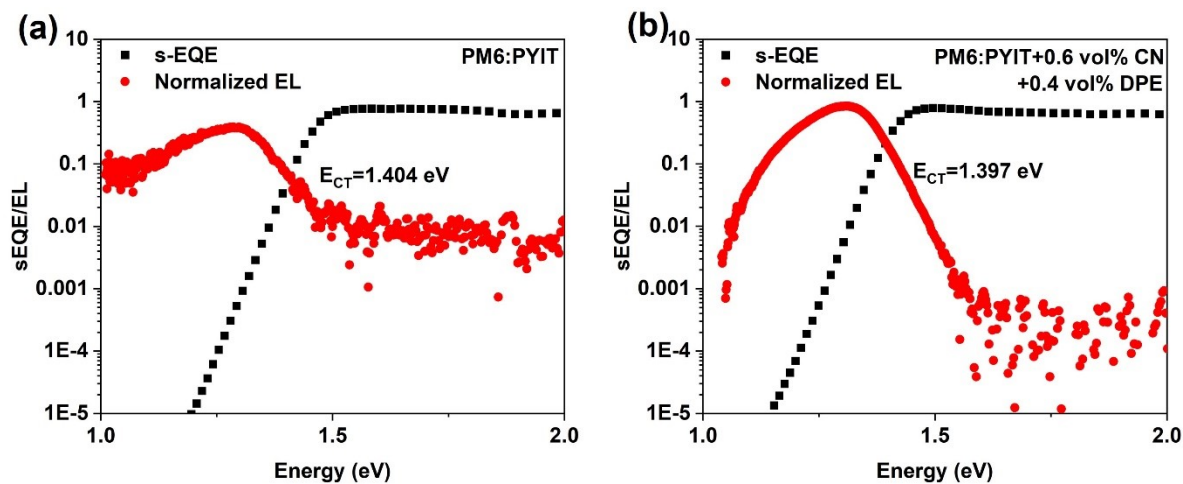

Figure S4. sEQE and EL spectra of devices treated with no additive and dual-additive.

## 5. AFM Measurement

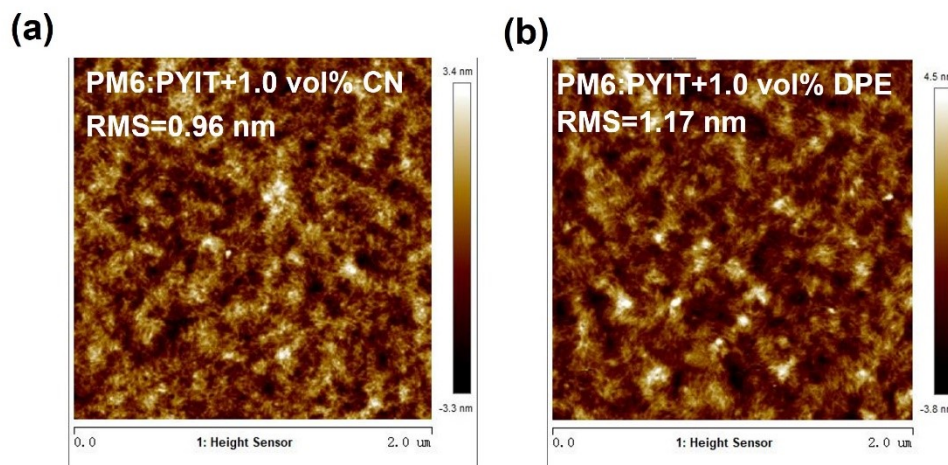

**Figure S5.** The AFM height images of PM6:PYIT active layers (a) with CN (b) with DPE.

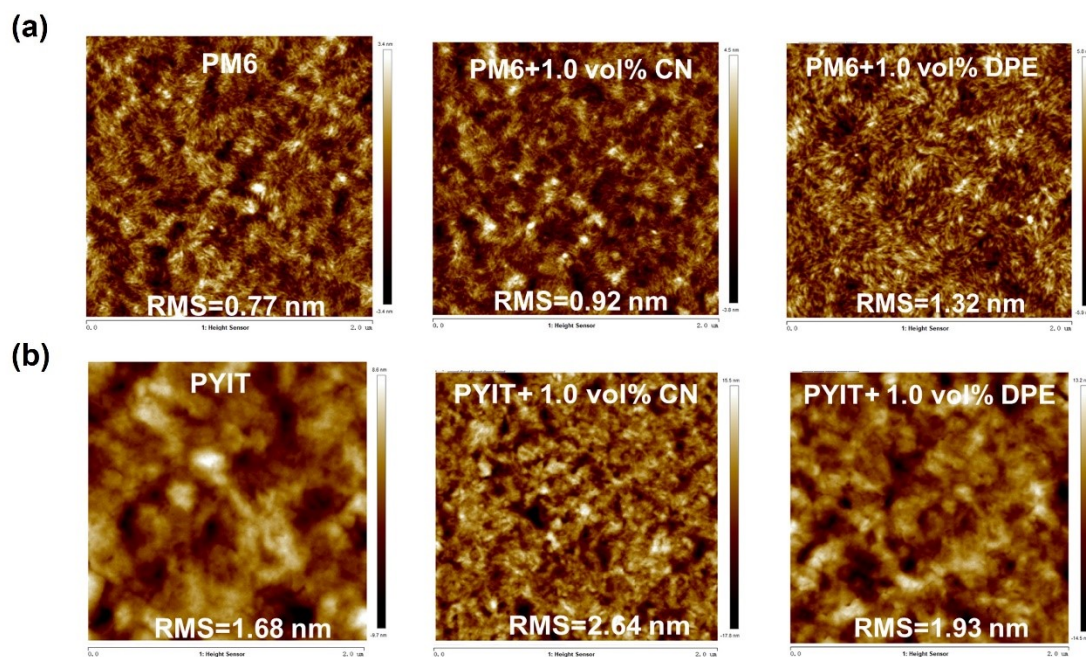

**Figure S6.** The AFM images of (a) PM6 pure films with different additives; (b) PYIT pure films with different additives.

## 6. Film-Depth-Dependent Light Absorption Spectroscopy

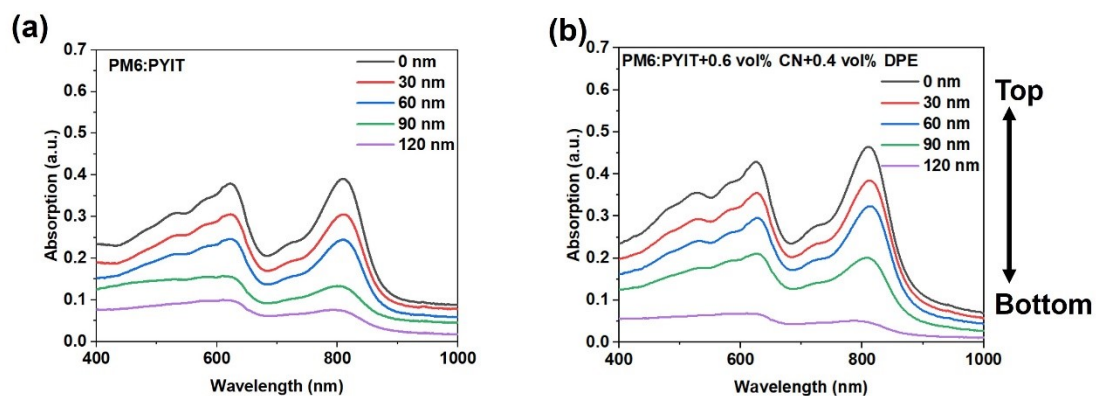

**Figure S7.** Film-depth-dependent-light absorption spectroscopy of (a) no additive and (b) dual-additive treated PM6:PYIT blend films.

## 7. Contact angle measurement.

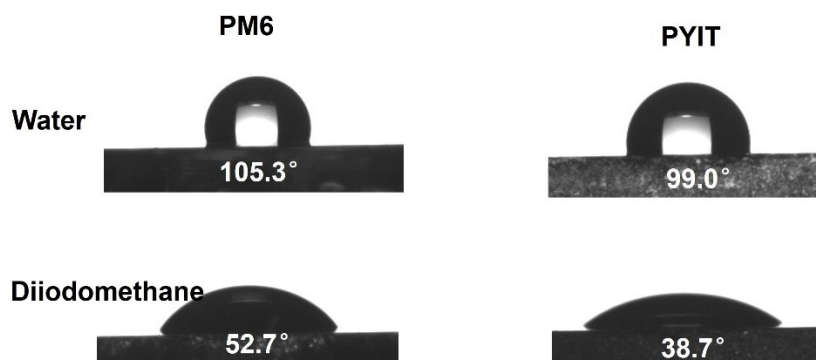

**Figure S8.** Contact angle images of neat PM6 and PYIT films.

## 8. UV-vis Absorption Spectroscopy

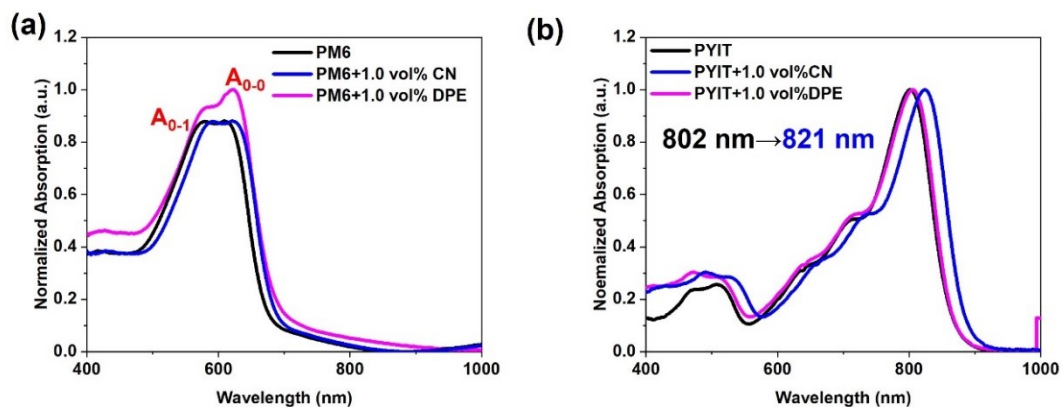

**Figure S9.** Normalized UV-vis absorption spectrum: (a) PM6 pure films with different additives; (b) PYIT pure films with different additives.

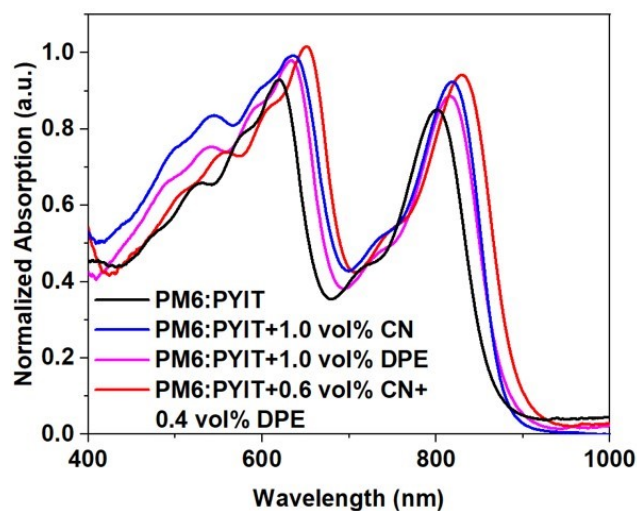

**Figure S10.** The Normalized absorption spectra of the PM6:PYIT BJJ active layer prepared under different processing conditions.

## 9. GIWAXS Measurement

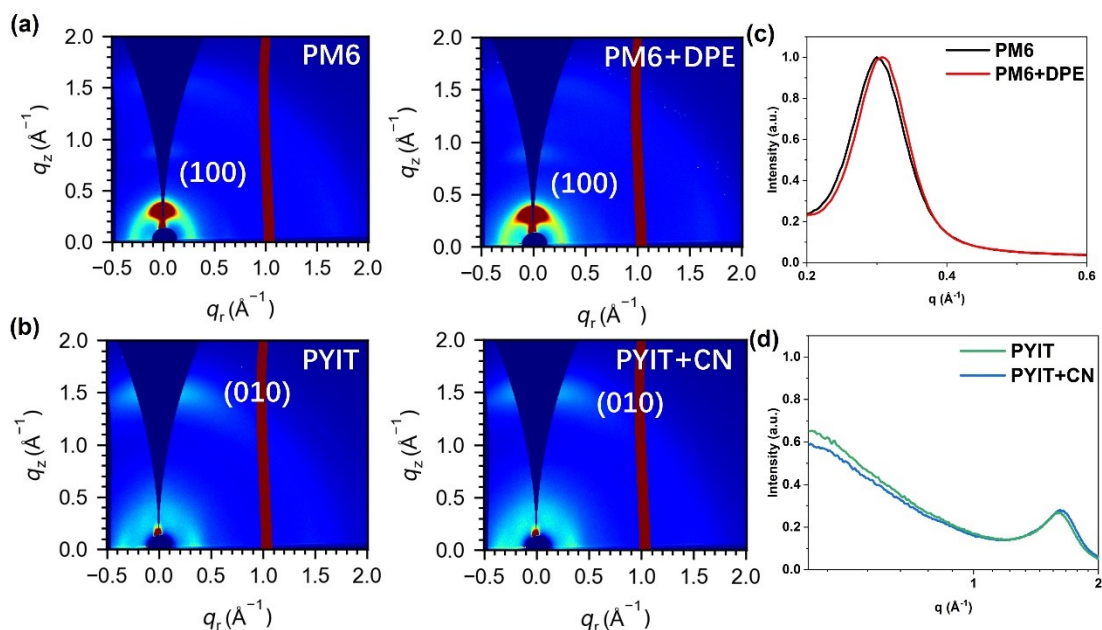

**Figure S11.** 2D GIWAXS images of (a) PM6 and (b) PYIT neat films before and after adding additives; The one-dimensional integrated signal of the (c) PM6 (100) peak and the (d) PYIT (010) peak in the out-of-plane direction.



## 10. Auxiliary Table

**Table S1.** Photovoltaic performance parameters of the OSCs based on PM6:PYIT with different additives.

| Additive condition             | $J_{sc}$ (mA/cm <sup>2</sup> ) | $V_{oc}$ (V)           | FF(%)                 | PCE(%)                |
|--------------------------------|--------------------------------|------------------------|-----------------------|-----------------------|
| 0.3 vol%<br>CN+0.7 vol%<br>DPE | 25.39<br>(25.01±0.31)          | 0.948<br>(0.947±0.001) | 66.72<br>(66.43±1.39) | 16.06<br>(15.77±0.46) |
| 0.6 vol%<br>CN+0.4 vol%<br>DPE | 24.99<br>(24.82±0.18)          | 0.949<br>(0.946±0.002) | 70.26<br>(70.27±0.42) | 16.67<br>(16.50±0.14) |
| 0.9 vol%<br>CN+0.1 vol%<br>DPE | 22.35<br>(21.98±0.33)          | 0.939<br>(0.937±0.002) | 71.17<br>(71.15±0.15) | 14.94<br>(14.65±0.28) |

**Table S2.** Specific numerical changes of BHJ PM6: PYIT absorption peak under different processing conditions.

| Devices                           | (PM6) $A_{0-0}/A_{0-1}$ | PM6 peak position | PYIT peak position |
|-----------------------------------|-------------------------|-------------------|--------------------|
| PM6:PYIT                          | 1.14                    | 618 nm            | 801 nm             |
| PM6:PYIT+1.0 vol% CN              | 1.06                    | 630 nm            | 817 nm             |
| PM6:PYIT+1.0 vol% DPE             | 1.17                    | 634 nm            | 813 nm             |
| PM6:PYIT+0.6 vol% CN+0.4 vol% DPE | 1.19                    | 647 nm            | 825 nm             |

**Table S3.** Parameters related to (010) diffraction peaks in the out-of-plane direction of

PM6:PYIT thin films.

| Samples       | $q$ (Å <sup>-1</sup> ) | d-spacing (Å) | FMHW(Å <sup>-1</sup> ) | CCL(Å) |
|---------------|------------------------|---------------|------------------------|--------|
| Control       | 1.58                   | 3.97          | 0.389                  | 14.36  |
| +CN           | 1.60                   | 3.92          | 0.359                  | 15.56  |
| +DPE          | 1.60                   | 3.92          | 0.362                  | 15.43  |
| Dual Additive | 1.64                   | 3.82          | 0.258                  | 21.66  |

**Table S4.** GIWAXS Parameters of the out-of-plane (100) peak in the blend films.

| Samples | $q$ (Å <sup>-1</sup> ) | d-spacing (Å) | FMHW(Å <sup>-1</sup> ) | CCL(Å) |
|---------|------------------------|---------------|------------------------|--------|
|---------|------------------------|---------------|------------------------|--------|

---

|               |      |       |       |       |
|---------------|------|-------|-------|-------|
| Control       | 0.31 | 20.25 | 0.085 | 65.75 |
| +CN           | 0.32 | 19.62 | 0.081 | 69.01 |
| +DPE          | 0.31 | 20.25 | 0.065 | 85.98 |
| Dual Additive | 0.34 | 18.47 | 0.063 | 88.71 |

---
